# Supplementary material
Source: Springer Nature journal article supplement (http://www.springermedizin.de/resource/supplementary/12874_2012_763_MOESM3_ESM.pdf/9432878)

A. from  $bY_0X_0$ 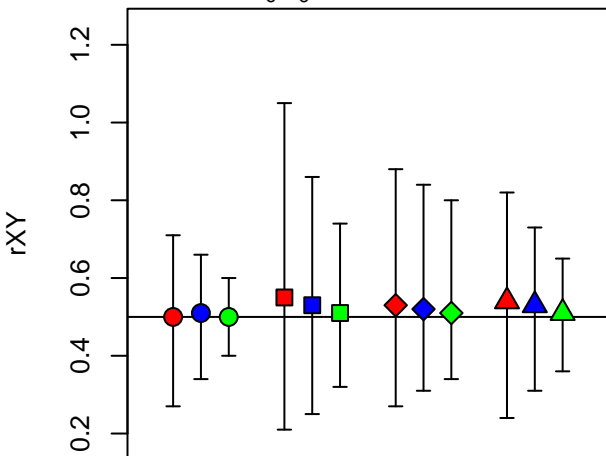B. from  $bYX_0$ 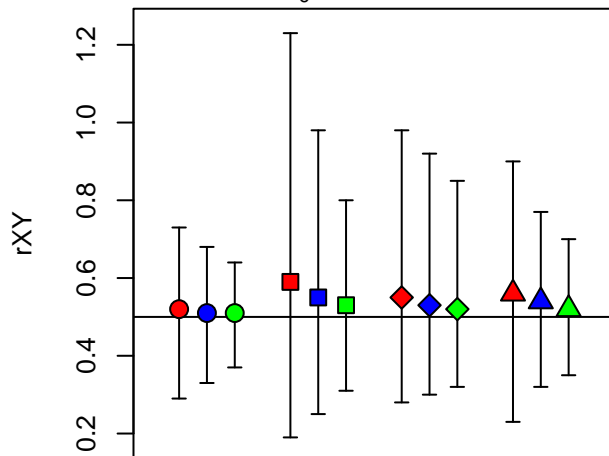C. from  $bY_0X$ 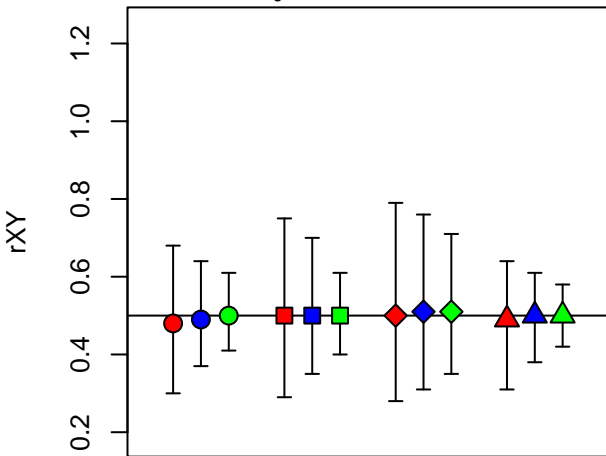D. from  $bYX$ 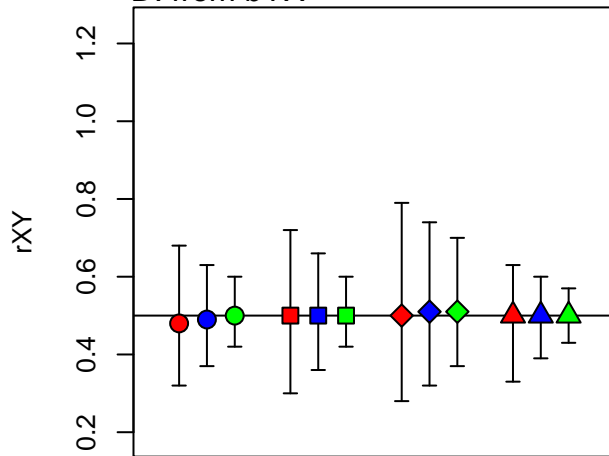

Supplement: MOESM3 [file 9432878]
